# APA Publishing Audio Books

## Listen anytime, anywhere

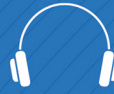

Purchase and listen at [appi.org](http://appi.org)

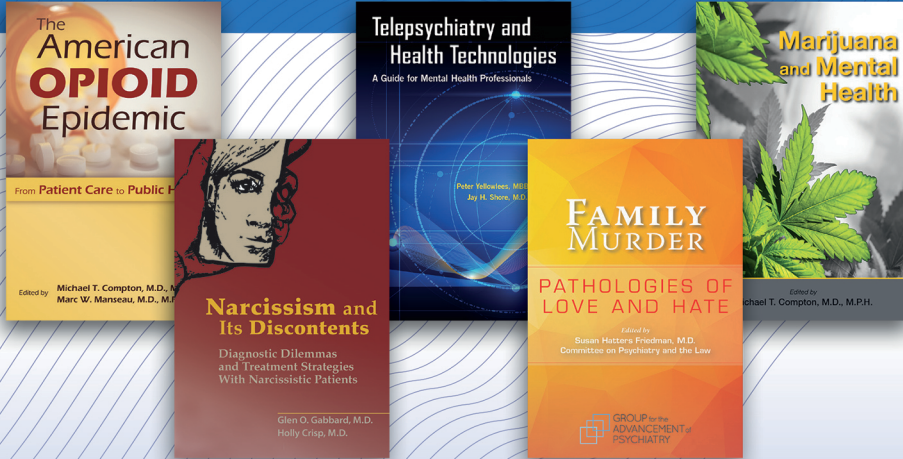

AMERICAN  
PSYCHIATRIC  
ASSOCIATION  
PUBLISHING

[www.appi.org](http://www.appi.org)  
Email: [appi@psych.org](mailto:appi@psych.org)  
Toll-Free: 1-800-368-5777

Also available at: Google Podcasts, Apple Podcasts, Spotify, Stitcher, and YouTube

### PS Form 3526 Statement of Ownership, Management, and Circulation (All Periodicals Publications Except Requester Publications)

|                                                                                                                                                                                                                                                                                                                                                                                                                                                                                                                                                                         |                                              |                                                       |                                                             |                              |
|-------------------------------------------------------------------------------------------------------------------------------------------------------------------------------------------------------------------------------------------------------------------------------------------------------------------------------------------------------------------------------------------------------------------------------------------------------------------------------------------------------------------------------------------------------------------------|----------------------------------------------|-------------------------------------------------------|-------------------------------------------------------------|------------------------------|
| 1. Publication Title<br>AMERICAN PSYCHIATRIC ASSOCIATION/<br>AMERICAN JOURNAL OF PSYCHIATRY (THE)                                                                                                                                                                                                                                                                                                                                                                                                                                                                       |                                              | 2. Publication Number<br>20200                        | ISSN<br>29530                                               | 3. Filing Date<br>09/15/2022 |
| 4. Issue Frequency<br>MONTHLY                                                                                                                                                                                                                                                                                                                                                                                                                                                                                                                                           | 5. Number of Issues Published Annually<br>12 |                                                       | 6. Annual Subscription Price<br>\$ 378.00                   |                              |
| 7. Complete Mailing Address of Known Office of Publication<br>800 MAINE AVE SW STE 900<br>WASHINGTON, VA, DC 20024-2812                                                                                                                                                                                                                                                                                                                                                                                                                                                 |                                              |                                                       | Contact Person<br>BRIAN COLE<br>Telephone<br>(202) 459-9750 |                              |
| 8. Complete Mailing Address of Headquarters or General Business Office of Publisher<br>800 Maine Ave, SW<br>Ste 900<br>Washington, DC 20024-2812                                                                                                                                                                                                                                                                                                                                                                                                                        |                                              |                                                       |                                                             |                              |
| 9. Full Names and Complete Mailing Addresses of Publisher, Editor, and Managing Editor                                                                                                                                                                                                                                                                                                                                                                                                                                                                                  |                                              |                                                       |                                                             |                              |
| Publisher (Name and complete mailing address)<br>Patrick Hansard<br>800 Maine Ave, SW<br>Ste 900<br>Washington, DC 20024-2812                                                                                                                                                                                                                                                                                                                                                                                                                                           |                                              |                                                       |                                                             |                              |
| Editor (Name and complete mailing address)<br>Robert Freedman<br>800 Maine Ave, SW<br>Ste 900<br>Washington, DC 20024-2812                                                                                                                                                                                                                                                                                                                                                                                                                                              |                                              |                                                       |                                                             |                              |
| Managing Editor (Name and complete mailing address)<br>Damaris Jackson<br>800 Maine Ave, SW<br>Ste 900<br>Washington, DC 20024-2812                                                                                                                                                                                                                                                                                                                                                                                                                                     |                                              |                                                       |                                                             |                              |
| 10. Owner (Do not leave blank. If the publication is owned by a corporation, give the name and address of the corporation immediately followed by the names and addresses of all stockholders owning or holding 1 percent or more of the total amount of stock. If not owned by a corporation, give names and addresses of the individual owners. If owned by a partnership or other unincorporated firm, give its name and address as well as those of each individual owner. If the publication is published by a nonprofit organization, give its name and address.) |                                              |                                                       |                                                             |                              |
| Full Name                                                                                                                                                                                                                                                                                                                                                                                                                                                                                                                                                               |                                              | Complete Mailing Address                              |                                                             |                              |
| American Psychiatric Assn                                                                                                                                                                                                                                                                                                                                                                                                                                                                                                                                               |                                              | 800 Maine Ave, SW, Ste 900, Washington, DC 20024-2812 |                                                             |                              |
| 11. Known Bondholders, Mortgagees, and Other Security Holders Owning or Holding 1 Percent or More of Total Amount of Bonds, Mortgages, or Other Securities. If none, check box <input checked="" type="checkbox"/> None                                                                                                                                                                                                                                                                                                                                                 |                                              |                                                       |                                                             |                              |
| Full Name                                                                                                                                                                                                                                                                                                                                                                                                                                                                                                                                                               |                                              | Complete Mailing Address                              |                                                             |                              |
| 12. Tax Status (For completion by nonprofit organizations authorized to mail at nonprofit rates)<br>The purpose, function, and nonprofit status of this organization and the exempt status for federal income tax purposes:<br><input checked="" type="checkbox"/> Has Not Changed During Preceding 12 Months<br><input type="checkbox"/> Has Changed During Preceding 12 Months (Publisher must submit explanation of change with this statement)                                                                                                                      |                                              |                                                       |                                                             |                              |

PS Form 3526, September 2007 (Page 1)

PRIVACY NOTICE: See our privacy policy on [www.usps.com](http://www.usps.com)

|                                                                                                                                                                                                                                                                                                                                                        |                                                                                                                                                                    |                                                               |                                                                |
|--------------------------------------------------------------------------------------------------------------------------------------------------------------------------------------------------------------------------------------------------------------------------------------------------------------------------------------------------------|--------------------------------------------------------------------------------------------------------------------------------------------------------------------|---------------------------------------------------------------|----------------------------------------------------------------|
| 13. Publication Title<br>AMERICAN PSYCHIATRIC ASSOCIATION/AMERICAN JOURNAL<br>OF PSYCHIATRY (THE)                                                                                                                                                                                                                                                      |                                                                                                                                                                    | 14. Issue Date for Circulation Data Below<br>09/01/2022       |                                                                |
| 15. Extend and Nature of Circulation                                                                                                                                                                                                                                                                                                                   |                                                                                                                                                                    | Average No. Copies Each Issue<br>During Preceding 12 Months   | No. Copies of Single Issue<br>Published Nearest to Filing Date |
| a. Total Numbers of Copies (Net press run)                                                                                                                                                                                                                                                                                                             |                                                                                                                                                                    | 27652                                                         | 29205                                                          |
| b. Paid<br>Circulation<br>(By Mail<br>and<br>Outside<br>the Mail)                                                                                                                                                                                                                                                                                      | (1) Mailed Outside County Paid Subscriptions Stated on PS Form 3541 (include paid distribution above nominal rate, advertiser's proof copies, and exchange copies) | 25944                                                         | 27287                                                          |
|                                                                                                                                                                                                                                                                                                                                                        | (2) Mailed In-County Paid Subscriptions Stated on PS Form 3541 (include paid distribution above nominal rate, advertiser's proof copies, and exchange copies)      | 0                                                             | 0                                                              |
|                                                                                                                                                                                                                                                                                                                                                        | (3) Paid Distribution Outside the Mails Including Sales Through Dealers and Carriers, Street Vendors, Counter Sales, and Other Paid Distribution Outside USPS      | 0                                                             | 0                                                              |
|                                                                                                                                                                                                                                                                                                                                                        | (4) Paid Distribution by Other Classes of Mail Through the USPS (e.g. First-Class Mail)                                                                            | 0                                                             | 0                                                              |
| c. Total Paid Distribution (Sum of 15b (1), (2), (3), (4))                                                                                                                                                                                                                                                                                             |                                                                                                                                                                    | 25944                                                         | 27287                                                          |
| d. Free or<br>Nominal<br>Rate<br>Distribution<br>(By Mail<br>and<br>Outside<br>the Mail)                                                                                                                                                                                                                                                               | (1) Free or Nominal Rate Outside County Copies included on PS Form 3541                                                                                            | 0                                                             | 0                                                              |
|                                                                                                                                                                                                                                                                                                                                                        | (2) Free or Nominal Rate In-County Copies included on PS Form 3541                                                                                                 | 0                                                             | 0                                                              |
|                                                                                                                                                                                                                                                                                                                                                        | (3) Free or Nominal Rate Copies Mailed at Other Classes Through the USPS (e.g. First-Class Mail)                                                                   | 0                                                             | 0                                                              |
|                                                                                                                                                                                                                                                                                                                                                        | (4) Free or Nominal Rate Distribution Outside the Mail (Carriers or other means)                                                                                   | 80                                                            | 50                                                             |
| e. Total Free or Nominal Rate Distribution (Sum of 15d (1), (2), (3), (4))                                                                                                                                                                                                                                                                             |                                                                                                                                                                    | 80                                                            | 50                                                             |
| f. Total Distribution (Sum of 15c and 15e)                                                                                                                                                                                                                                                                                                             |                                                                                                                                                                    | 26024                                                         | 27337                                                          |
| g. Copies not Distributed                                                                                                                                                                                                                                                                                                                              |                                                                                                                                                                    | 0                                                             | 0                                                              |
| h. Total (Sum of 15f and 15g)                                                                                                                                                                                                                                                                                                                          |                                                                                                                                                                    | 26024                                                         | 27337                                                          |
| i. Percent Paid ((15c / 15f) times 100)                                                                                                                                                                                                                                                                                                                |                                                                                                                                                                    | 99.69 %                                                       | 99.82 %                                                        |
| 16. If total circulation includes electronic copies, report that circulation on lines below.                                                                                                                                                                                                                                                           |                                                                                                                                                                    |                                                               |                                                                |
| a. Paid Electronic Copies                                                                                                                                                                                                                                                                                                                              |                                                                                                                                                                    | 0                                                             | 0                                                              |
| b. Total Paid Print Copies (Line 15c) + Paid Electronic Copies                                                                                                                                                                                                                                                                                         |                                                                                                                                                                    | 0                                                             | 0                                                              |
| c. Total Print Distribution (Line 15f) + Paid Electronic Copies                                                                                                                                                                                                                                                                                        |                                                                                                                                                                    | 0                                                             | 0                                                              |
| d. Percent Paid (Both Print and Electronic Copies)                                                                                                                                                                                                                                                                                                     |                                                                                                                                                                    | 0.00 %                                                        | 0.00 %                                                         |
| <input type="checkbox"/> I certify that 50% of all my distributed copies (Electronic and Print) are paid above a nominal price.                                                                                                                                                                                                                        |                                                                                                                                                                    |                                                               |                                                                |
| 17. Publication of Statement of Ownership                                                                                                                                                                                                                                                                                                              |                                                                                                                                                                    |                                                               |                                                                |
| <input type="checkbox"/> If the publication is a general publication, publication of this statement is required. Will be printed in _____ issue of this publication.                                                                                                                                                                                   |                                                                                                                                                                    | <input checked="" type="checkbox"/> Publication not required. |                                                                |
| 18. Signature and Title of Editor, Publisher, Business Manager, or Owner                                                                                                                                                                                                                                                                               |                                                                                                                                                                    | Title                                                         | Date                                                           |
| Brian Cole                                                                                                                                                                                                                                                                                                                                             |                                                                                                                                                                    | Publishing Operations Manager                                 | 09/15/2022 10:28:14 AM                                         |
| I certify that all information furnished on this form is true and complete. I understand that anyone who furnishes false or misleading information on this form or who omits material or information requested on the form may be subject to criminal sanctions (including fines and imprisonment) and/or civil sanctions (including civil penalties). |                                                                                                                                                                    |                                                               |                                                                |

PS Form 3526, September 2007 (Page 2)

PRIVACY NOTICE: See our privacy policy on [www.usps.com](http://www.usps.com)

# ▶ PODCASTS from APA Publishing

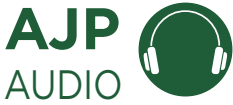

## AJP Audio

Host: Aaron van Dorn

Each episode features an in-depth interview with authors featured in that month's issue of *The American Journal of Psychiatry*.

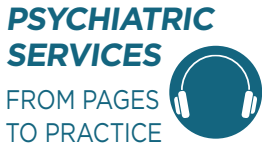

## Psychiatric Services From Pages to Practice

Hosts: Lisa Dixon, M.D., M.P.H., Editor, *Psychiatric Services*, and Josh Berezin, M.D., M.S.

Learn about the latest mental health services research published in *Psychiatric Services* and why it is relevant. Topics include community-based treatment programs, collaborative care, evidence-based treatment and service delivery, criminal and social justice, policy analysis, and more.

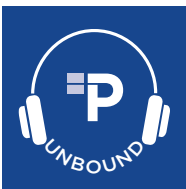

## Psychiatry Unbound

Host: Laura Roberts, M.D., M.A., Editor-in-Chief, APA Publishing Books

APA Publishing's Books podcast offers the opportunity to hear the voices behind the most prominent psychiatric scholarship in the field today. Learn about important topics in the field of psychiatry and see how our authors are making an impact in clinical settings throughout the world.

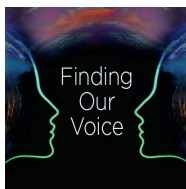

## Finding Our Voice

Host: Sanya Virani, MBBS, MPH

*Finding Our Voice* brings the viewpoints and opinions of the next generation of psychiatrists—including residents, fellows, and early career psychiatrists—to the forefront. Topics covered include systemic racism and social determinants.

Subscribe Today!

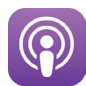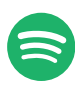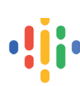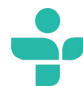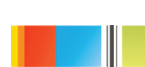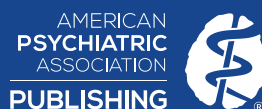

## Subscription and Business Information

*The American Journal of Psychiatry*, ISSN 0002-953X, is published monthly by the American Psychiatric Association.

The American Psychiatric Association does not hold itself responsible for statements made in its publications by contributors or advertisers. Unless so stated, material in *The American Journal of Psychiatry* does not reflect the endorsement, official attitude, or position of the American Psychiatric Association or of the Journal's Editorial Board.

Periodicals postage paid at Washington, DC, and additional mailing offices. POSTMASTER: Send address changes to *The American Journal of Psychiatry*, Circulation Department, American Psychiatric Association, 800 Maine Avenue, S.W., Suite 900, Washington, D.C. 20024.

### Editorial Office

*American Journal of Psychiatry*  
American Psychiatric Association  
800 Maine Avenue, S.W., Suite 900  
Washington, D.C. 20024  
E-mail: [ajp@psych.org](mailto:ajp@psych.org)

### Customer Service

Phone: (800) 368-5777 (toll-free)  
E-mail: [appi@psych.org](mailto:appi@psych.org)

### APA Member Subscription Services

Phone: (888) 35-PSYCH (toll-free)

### Subscriptions

Regular and resident-fellow members in the U.S. receive print and online access as a **member benefit**. Subscriptions for non-members start at \$378 per year. Online only subscriptions start at \$342 per year. Go to <https://www.appi.org/ajp> for more information.

Institutional subscriptions are tier priced. For institutional site license or pricing information, contact (202) 559-3729 or [institutions@psych.org](mailto:institutions@psych.org).

*Additional subscription options, including single issues and student rates*  
Contact Customer Service

### Advertising

*Pharmaceutical Print and Online Advertising*  
Frank Cox, Kathleen Harrison, Tim Wolfinger  
Pharmaceutical Media, Inc.  
30 East 33rd Street  
New York, NY 10016  
Phone: (212) 904-0379  
E-mail: [twolfinger@pminy.com](mailto:twolfinger@pminy.com)

*Nonpharmaceutical and Online Sales*  
Eamon Wood  
Pharmaceutical Media, Inc.  
E-mail: [ewood@pminy.com](mailto:ewood@pminy.com)  
(see address and phone above).

### Permissions and Reprints

Material published in the journals of the American Psychiatric Association and American Psychiatric Association Publishing is protected by copyright and all rights are reserved. Material may not be reproduced in any form or by any means without written permission from the copyright owner. For permission to reproduce material published by APA, please visit <http://www.appi.org/customer-service/permissions> for more information. Permission can also be secured through the Copyright Clearance Center ([www.copyright.com](http://www.copyright.com)).

APA does not require that permission be obtained for the photocopying of isolated articles for nonprofit classroom or library reserve use; all fees associated with such permission are waived. This consent does not extend to other kinds of copying, such as copying for general distribution, for advertising or promotional purposes, for creating new collective works, or for resale. Requests for commercial distribution and bulk reprints should be directed to (202) 609-7075.

Indexed in Abstracts for Social Workers, Academic Abstracts, Biological Abstracts, Chemical Abstracts, Chicago Psychoanalytic Literature Index, Cumulative Index to Nursing Literature, Excerpta Medica, Hospital Literature Index, Index Medicus, International Nursing Index, Nutrition Abstracts, Psychological Abstracts, Science Citation Index, Social Science Source, and Social Sciences Index.

Pages are produced by TNQ Technologies (Chennai, India) effective with Volume 179, Number 3, March 2022, and printed by Sheridan NH (Hanover, NH) on acid-free paper effective with Volume 169, Number 1, January 2012.

© 2022 American Psychiatric Association.

# We've got you covered

## APA Endorsed Professional Liability Insurance

The use of telepsychiatry is increasing and projected to expand. With the significant increase in cyber attacks against individuals and businesses, psychiatrists who maintain confidential and sensitive data are prime targets, regardless of having a private practice or working for a company.

We provide comprehensive professional liability coverage, which includes telebehavioral health coverage. What's more, our insureds have the opportunity to purchase a cyber protection endorsement allowing for peace of mind and the ability to concentrate on what psychiatrists do best, helping others.

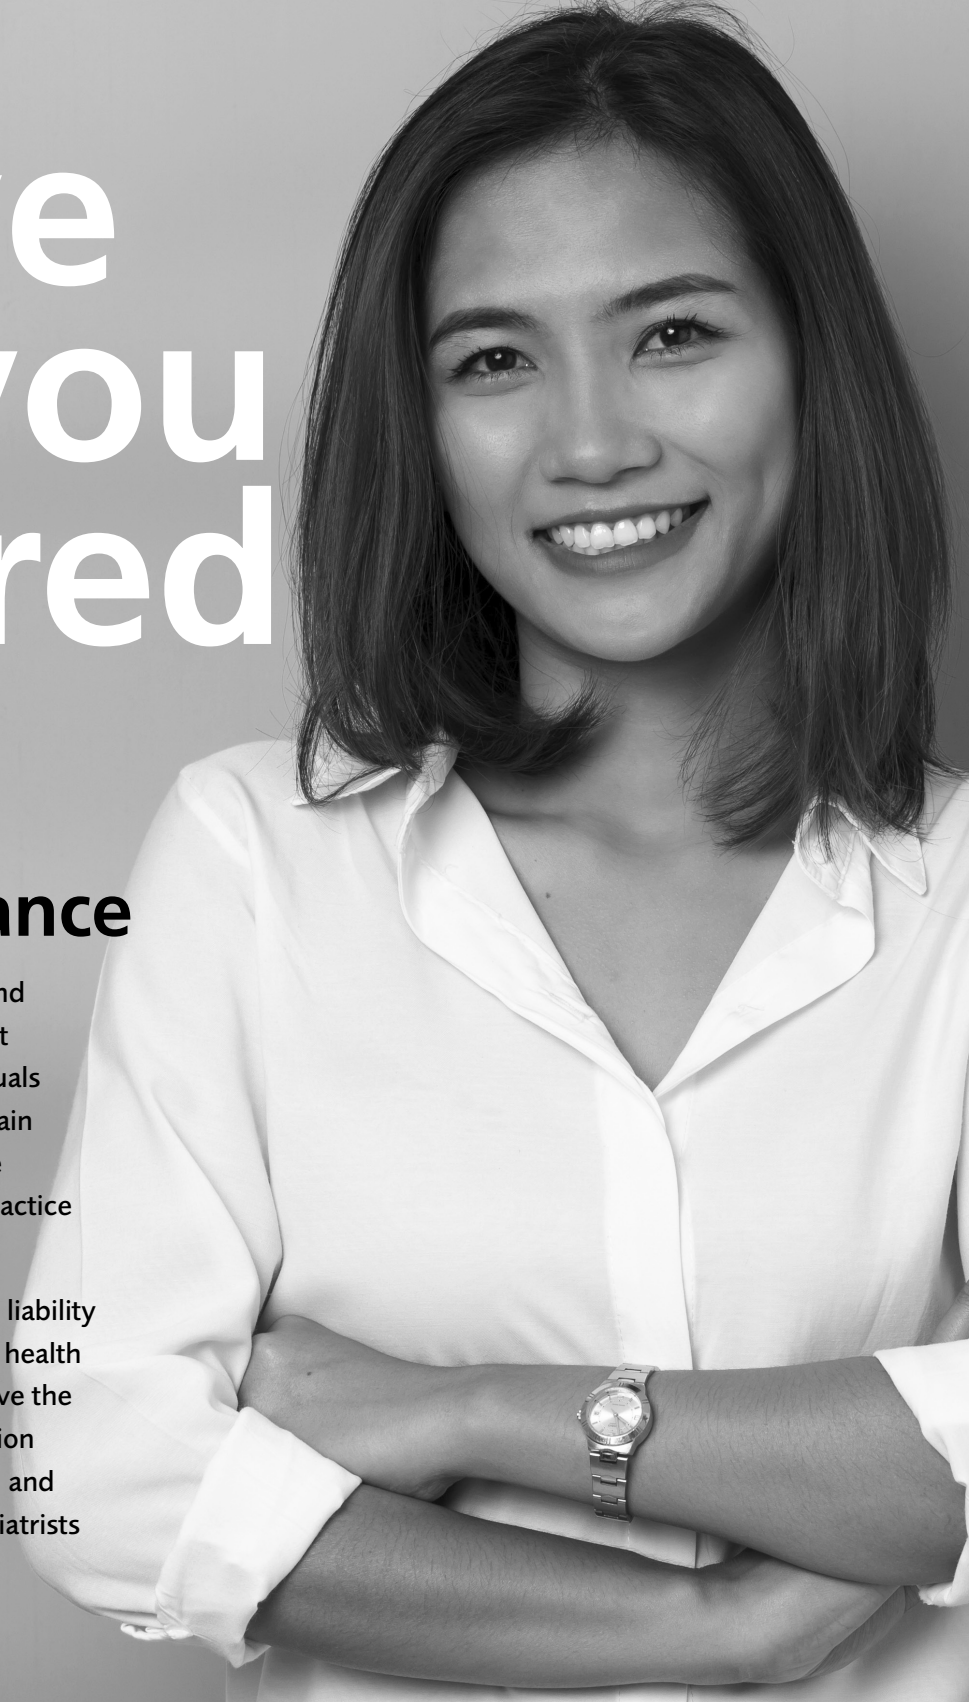

Visit us at [apamalpractice.com](http://apamalpractice.com) or call (800) 421-6694 Ext. 2318 to learn more.

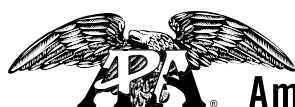

**American Professional Agency**

LEADERS IN PSYCHIATRIC MEDICAL LIABILITY INSURANCE

ENDORSED BY

AMERICAN  
PSYCHIATRIC  
ASSOCIATION

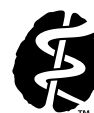

Source: http://ajp.psychiatryonline.org/doi/suppl/10.1176/ajp.2022.179.issue-11/suppl_file/back.pdf
