# The American Journal of Psychiatry

## A. Mixed effect directions

1. Genetic overlap with concordant effects = positive  $r_g$

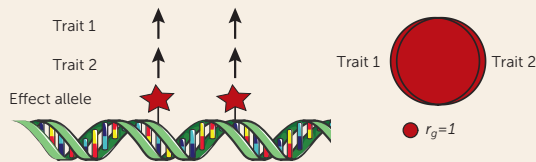

2. Genetic overlap with discordant effects = negative  $r_g$

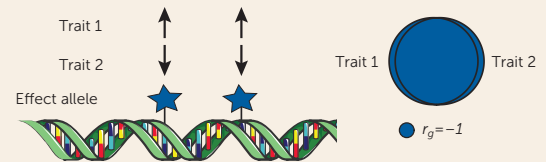

3. Genetic overlap with balanced effects = nonsignificant  $r_g$

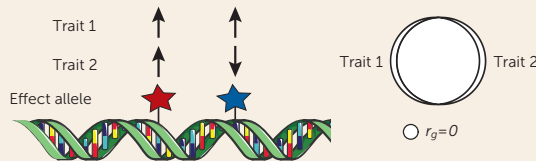

4. No genetic overlap = nonsignificant  $r_g$

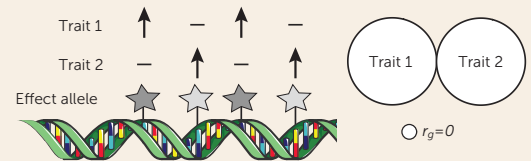

## B. Correlation of shared variants ( $r_{gs}$ )

1. Genetic overlap with mixed effects = weak positive  $r_g$   
weak positive  $r_{gs}$

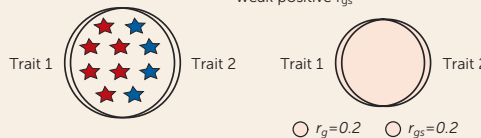

2. Minimal overlap with concordant effects = weak positive  $r_g$   
strong positive  $r_{gs}$

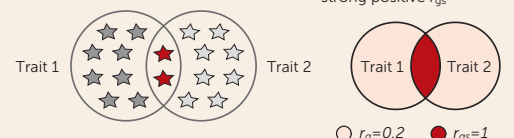

Polygenic Scores in Psychiatry: On the Road From Discovery to Implementation

Genetic and Environmental Contribution to the Co-Occurrence of Endocrine-Metabolic Disorders and Depression

Charting the Landscape of Genetic Overlap Between Mental Disorders and Related Traits Beyond Genetic Correlation

Similar Rates of Deleterious Copy Number Variants in Early-Onset Psychosis and Autism Spectrum Disorder
